# Supplementary material
Source: publisher site journal article supplement (https://www.dovepress.com/article/341771)

|  | HR | CI | *P*-value |
| --- | --- | --- | --- |
| MSX1 | 0.870 | 0.817 - 0.927 | 0.0000 |
| ERMN | 0.853 | 0.790 - 0.921 | 0.0001 |
| RP11-968O1.5 | 1.37 | 1.171 - 1.611 | 0.0001 |
| DCAF12L1 | 1.139 | 1.064 - 1.219 | 0.0002 |
| ALS2CR11 | 1.200 | 1.087 - 1.324 | 0.0003 |
| PDCL2 | 1.144 | 1.060 - 1.236 | 0.0006 |
| AQP5 | 0.886 | 0.825 - 0.951 | 0.0008 |
| SIT1 | 0.807 | 0.710 - 0.918 | 0.0011 |
| ZNF354C | 1.323 | 1.113 - 1.574 | 0.0015 |
| RPS6KA6 | 1.137 | 1.048 - 1.233 | 0.0020 |

**Supporting Table 1**

The top ten significantly prognosis-related methylation-driven genes in the results of the univariate Cox regression analysis.

**Supporting Figure 1.** PPI network shown in STRING database, which


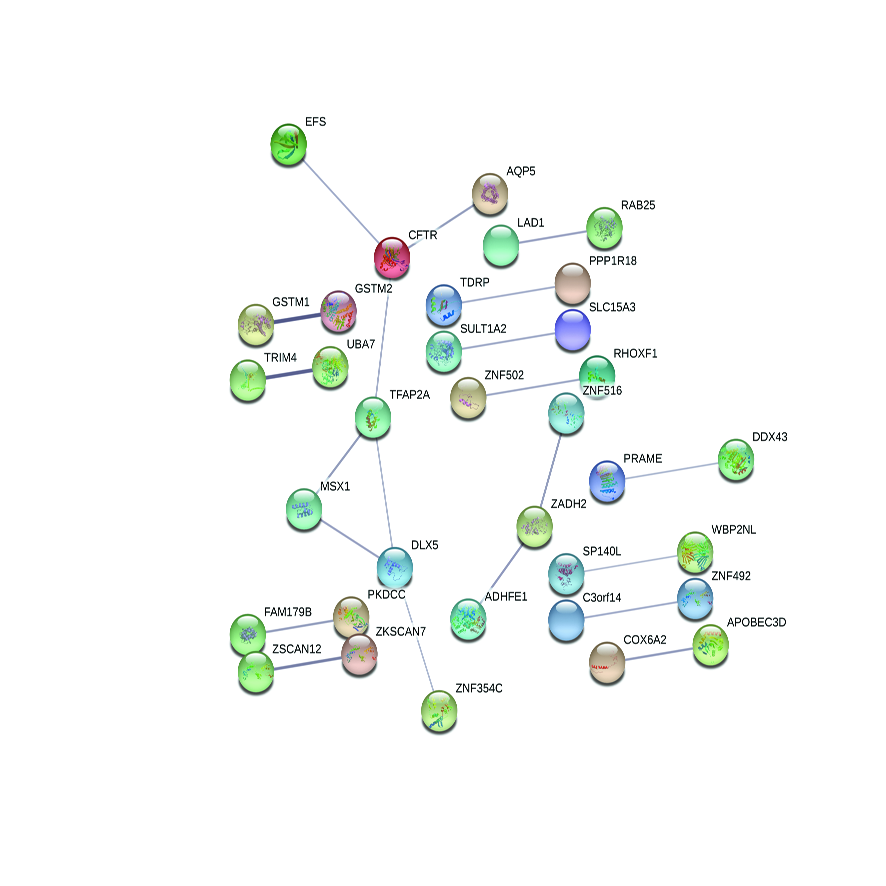
contained 101 nodes and 21 edges formed in the network of 127 methylation-driven genes. PPI, protein-protein interaction; STRING, Search Tool for the Retrieval of Interacting Genes.

**Supporting Figure 2.** Results of multivariate Cox proportional hazards regression analysis. *P<0.05, **P<0.01.


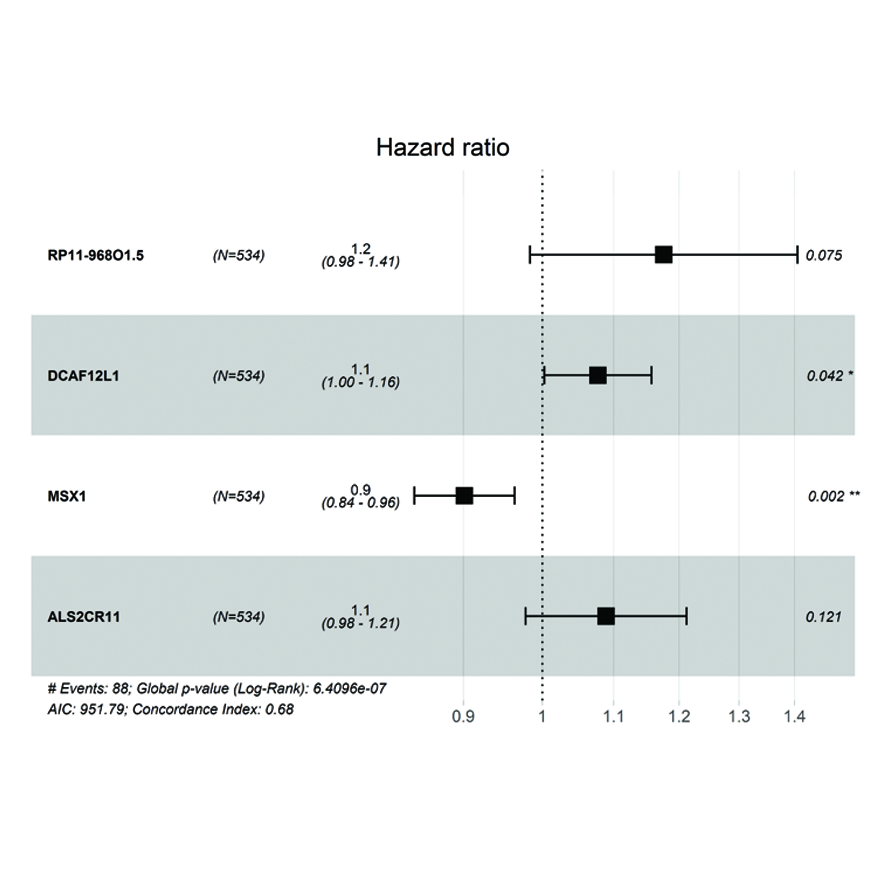


**Supporting Figure 3.** (A) The Univariate analysis of the association between clinical parameters (including the risk score) and overall survival of patients based on the TGGA (B) The multivariate analysis of the association between clinical parameters (including the risk score) and overall survival of patients based on the TGGA.


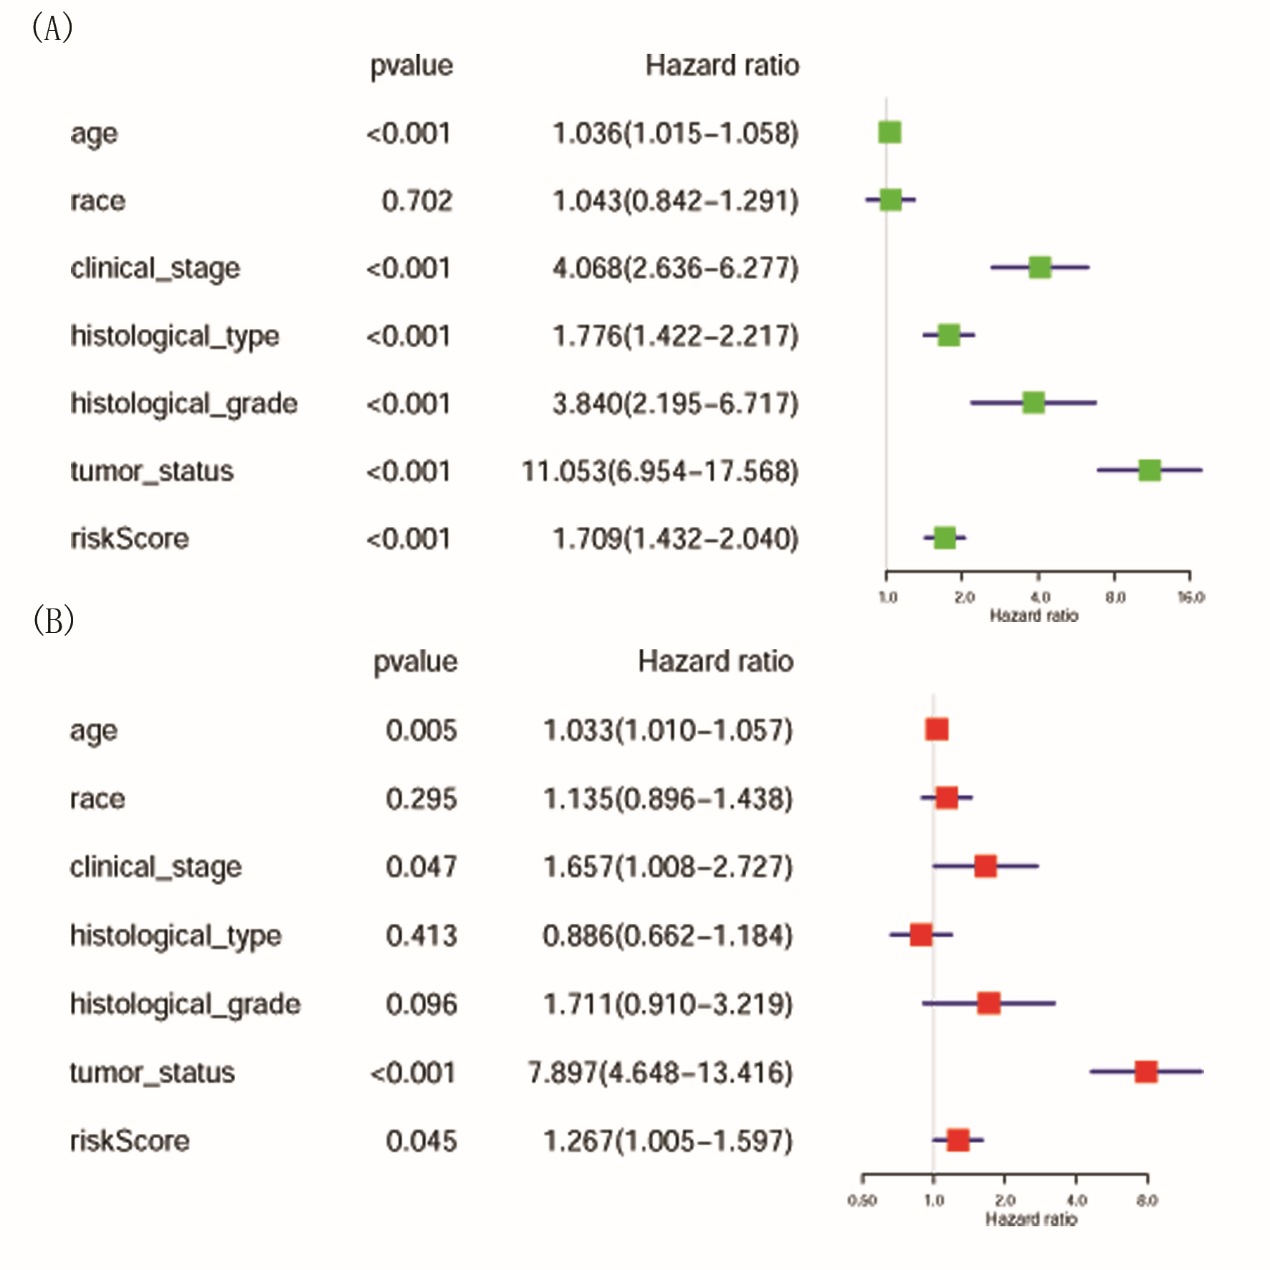


**Supporting Figure 4.** The heatmap of the four-gene expression levels between high- and low-risk groups in clinical information based on the TCGA dataset. **P<0.01, ***P<0.001.


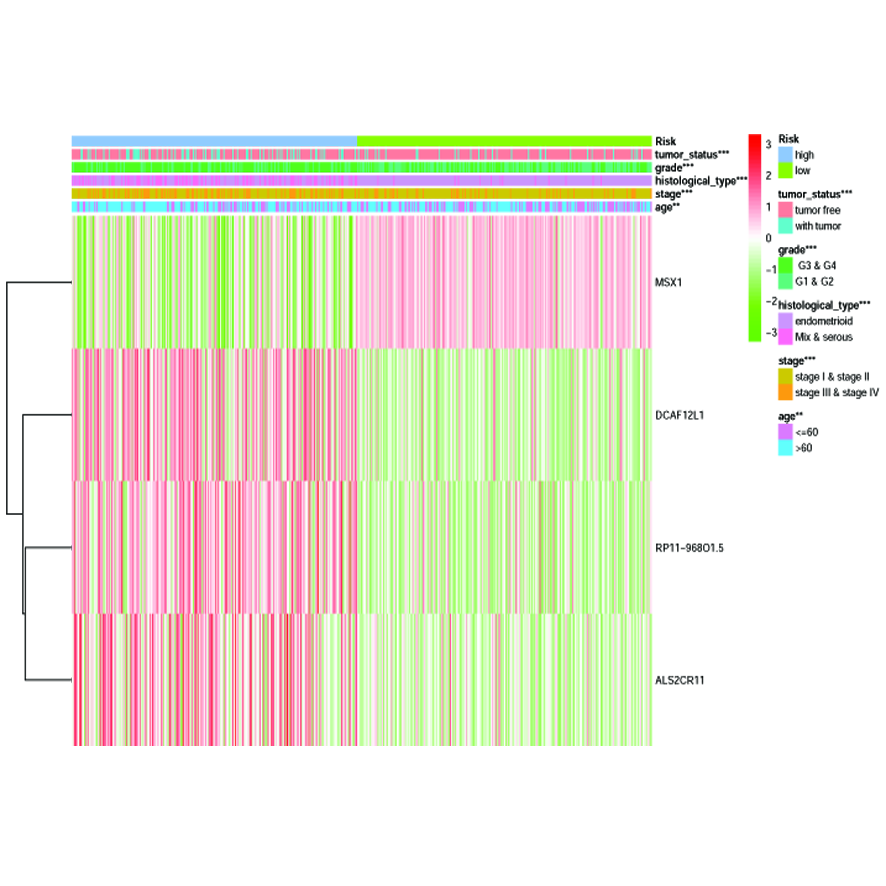

Supplement: Supplementary file 1 [file get_supplementary_file.php]
